# Supplementary material for: A novel 2D mesoporous phosphazene-anthraquinone-based covalent organic polymer: synthesis, characterization and supercapacitor applications
Source: Royal Society of Chemistry journal article supplement (doi:10.1039/d1nj01456k), 2021-01-01
Supplement: d1nj01456k1.pdf [file d1nj01456k1.pdf]

## Supporting information

### **A novel 2D mesoporous phosphazene-anthraquinone based covalent organic polymer: synthesis, characterization and supercapacitor applications**

Rui Xue<sup>a</sup>, Yan-Ping Zheng<sup>b</sup>, Lei Zhang<sup>b</sup>, Da-Ying Xu<sup>b</sup>, De-Quan Qian<sup>b</sup>, Yin-Sheng Liu<sup>b</sup>,  
Hong-Hong Rao<sup>b</sup>, Sheng-Li Huang<sup>a\*</sup>, Guo-Yu Yang<sup>a\*</sup>

a. MOE Key Laboratory of Cluster Science, Beijing Key Laboratory of Photoelectronic/Electrophotonic Conversion Materials, School of Chemistry and Chemical Engineering, Beijing Institute of Technology, Beijing, P. R. China;

b. School of Chemistry and Chemical Engineering, Lanzhou City University, Lanzhou, Gansu, P. R. China;

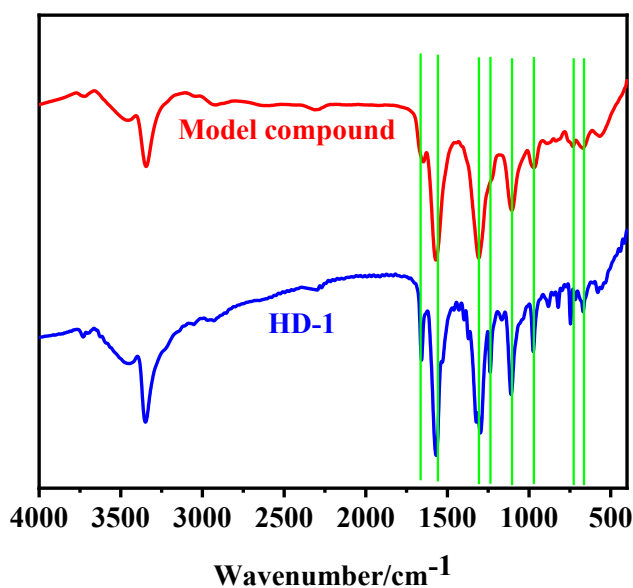

**Figure S1** FT-IR spectra of HD-1 and model compound.

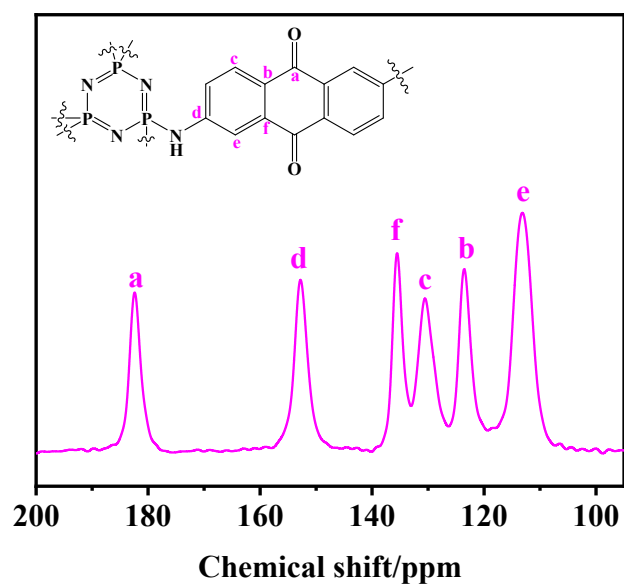

Figure S2  $^{13}\text{C}$  CP-MAS spectrum of HD-1

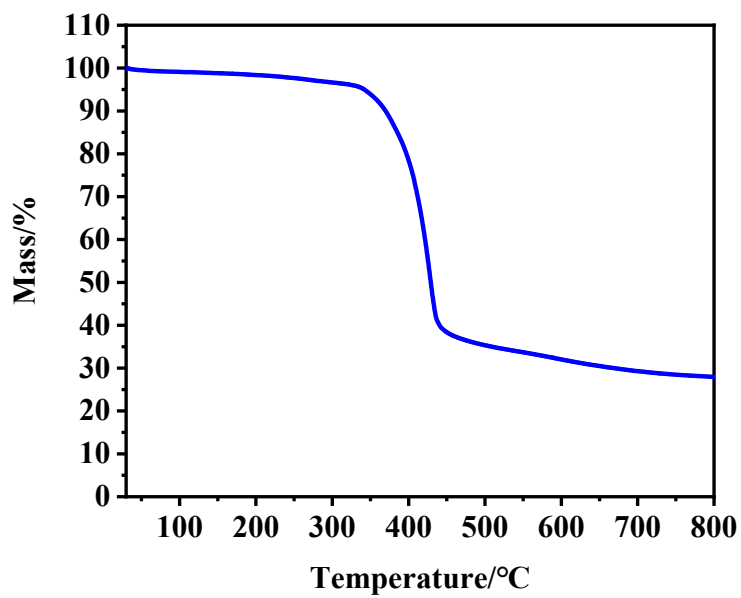

Figure S3 The TGA curve of HD-1

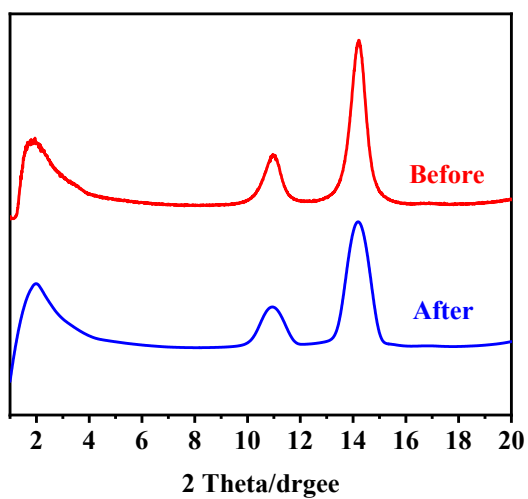

**Figure S4** The PXRD patterns before and after immersing in 6.0 M KOH solution for five days

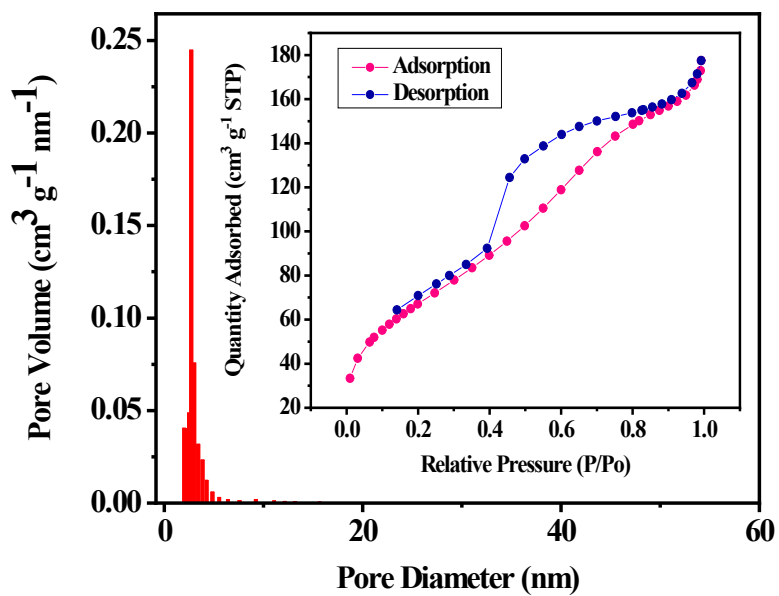

**Figure S5** Nitrogen adsorption and desorption isotherms, inset: pore size distribution profiles of HD-1

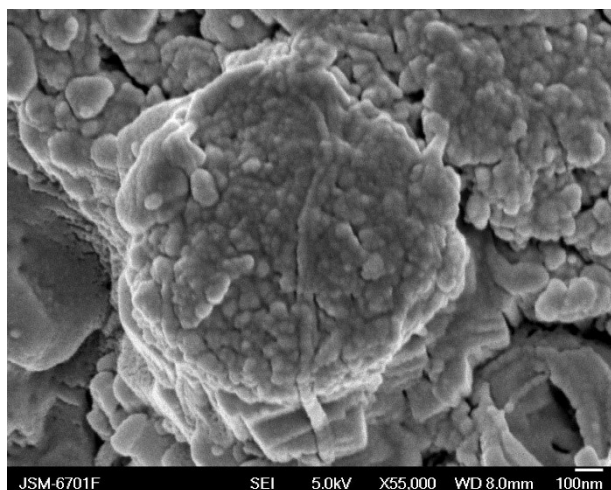

**Figure S6** SEM image of electrode materials after GCD cycling test

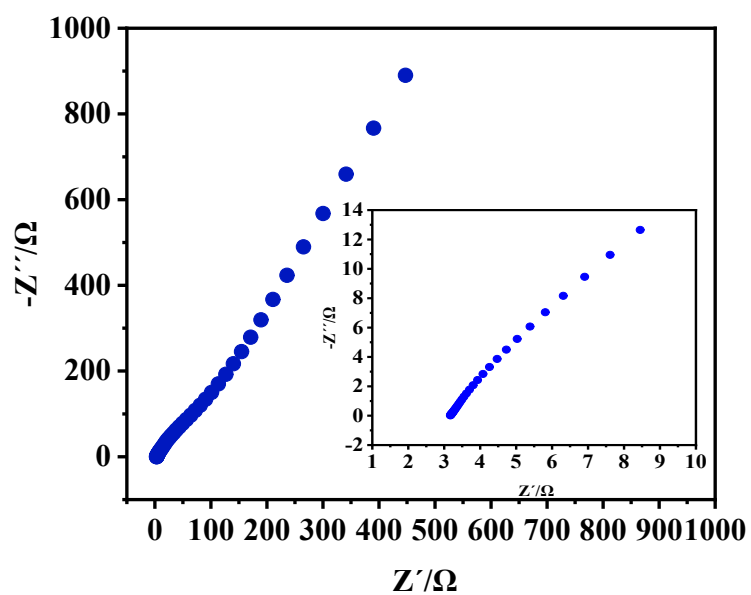

**Figure S7** Nyquist plot of HD-1 electrode, **inset:** enlarges view of the selected area
